# Supplementary material for: An indicator-displacement assay for naked-eye detection and quantification of histidine in human urine
Source: Royal Society of Chemistry journal article supplement (doi:10.1039/c2an35126a), 2012-01-01
Supplement: c2an35126a.pdf [file c2an35126a.pdf]

## *Electronic Supplementary Information*

### **An Indicator-Displacement Assay for Naked-Eye Detection and Quantification of Histidine in Human Urine**

**Shao-Kai Sun, Kai-Xiong Tu, and Xiu-Ping Yan\***

State Key Laboratory of Medicinal Chemical Biology, and Research Center for  
Analytical Sciences, College of Chemistry, Nankai University, Tianjin 300071, China

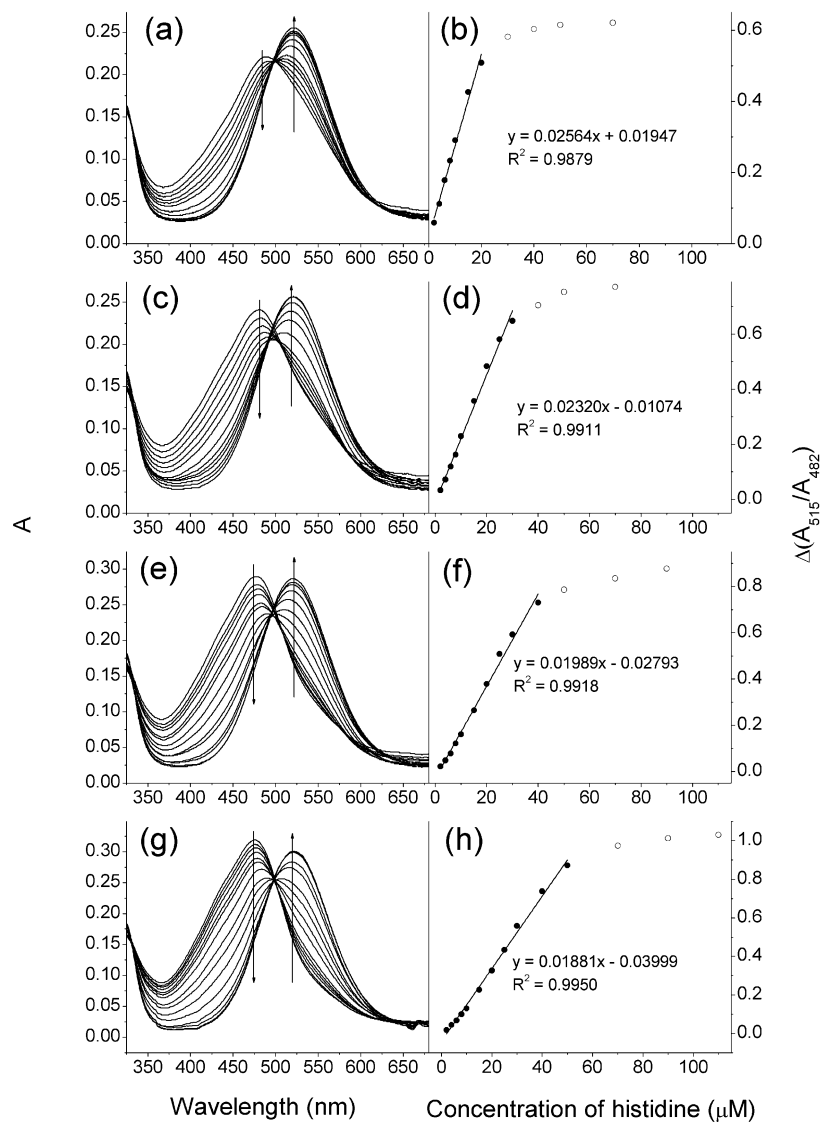

**Figure S1.** Effect of the molar ratio of murexide to  $\text{Ni}^{2+}$  on the UV-Vis spectra for histidine titration in Tris-HCl buffer (20 mM, pH 8.0) (a, c, e, g), and the corresponding calibration plots (b, d, f, h). Molar ratio of murexide to  $\text{Ni}^{2+}$  : (a, b) 25  $\mu\text{M}/10 \mu\text{M}$ ; (c, d) 25  $\mu\text{M}/15 \mu\text{M}$ ; (e, f) 25  $\mu\text{M}/20 \mu\text{M}$ ; (g, h) 25  $\mu\text{M}/25 \mu\text{M}$ .

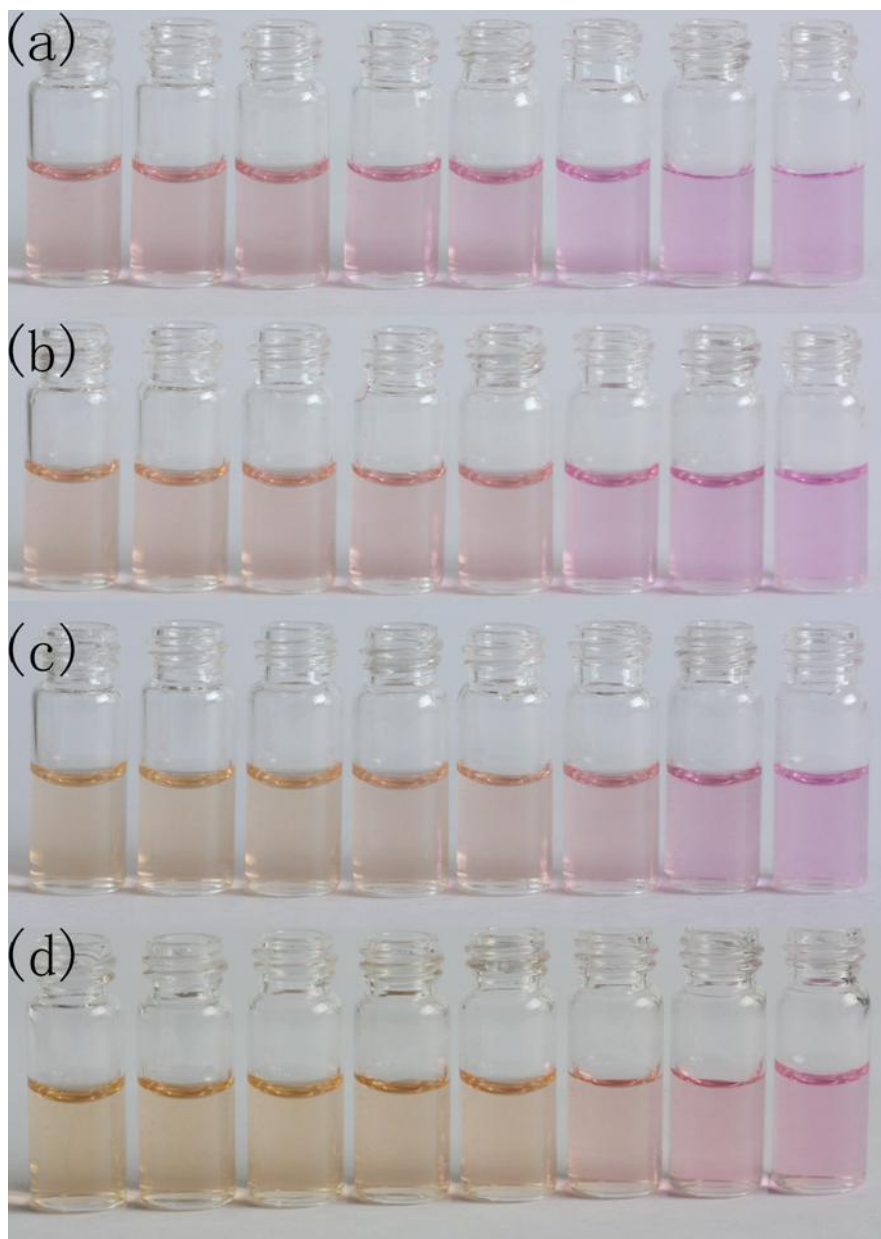

**Figure S2.** Effect of the concentration of Ni<sup>2+</sup> on the color change (from yellow to purple) of murexide (25 μM) upon addition of Ni<sup>2+</sup> (0-40 μM) in Tris-HCl buffer (20 mM, pH 8.0). Concentration of Ni<sup>2+</sup> (μM): (a) 10; (b) 15; (c) 20; (d) 25.

**Table S1.** Effect of Co-existing Substances on the Determination of 25  $\mu\text{M}$  Histidine by the Proposed Sensor

| substances       | concentration ( $\mu\text{M}$ ) | response change (%) |
|------------------|---------------------------------|---------------------|
| $\text{Na}^+$    | 100000                          | -6.0                |
| $\text{K}^+$     | 80000                           | 1.9                 |
| $\text{Ca}^{2+}$ | 50                              | 5.9                 |
| $\text{Mg}^{2+}$ | 20                              | 2.6                 |
| $\text{Fe}^{3+}$ | 2                               | 2.1                 |
| $\text{Zn}^{2+}$ | 1                               | -9.2                |
| Glucose          | 1000000                         | 2.0                 |
| Urea             | 100                             | 3.0                 |
| Uric acid        | 5                               | -0.1                |
| Ascorbic acid    | 200                             | 3.5                 |
| HSA              | 1.25 ( $\text{mg L}^{-1}$ )     | 3.5                 |
